# Supplementary figures and images for: WTMAD-4: a fair weighting scheme for GMTKN55
Source: Royal Society of Chemistry journal article supplement (doi:10.1039/d5cp03741g), 2025-12-09

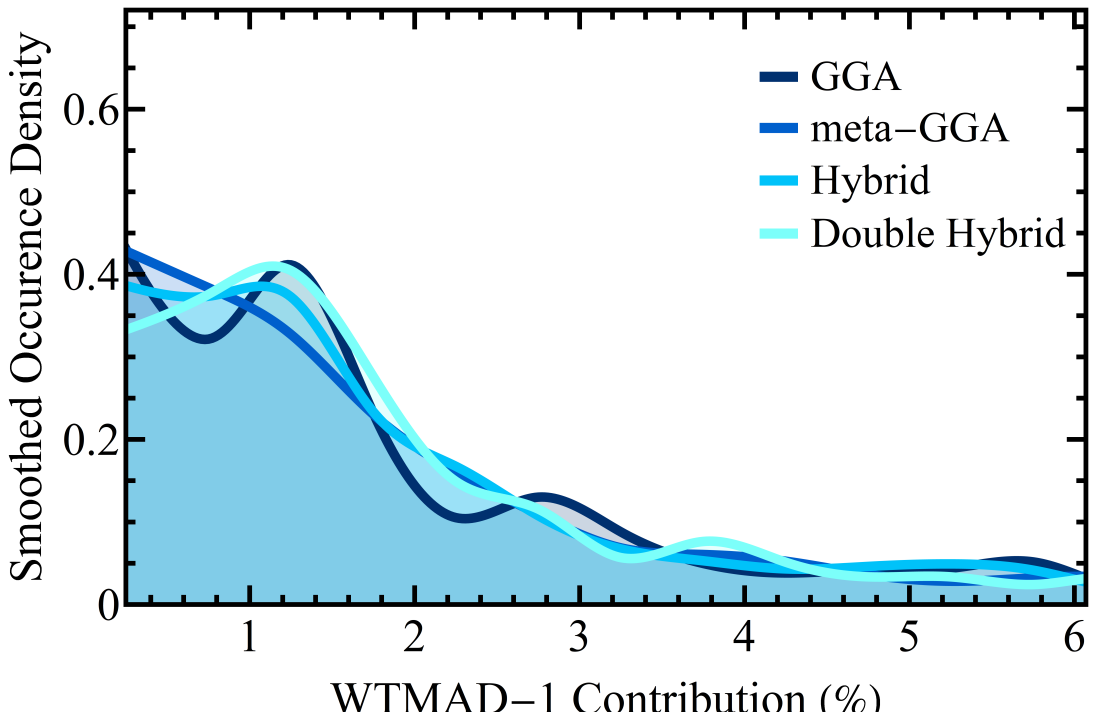

Supplement: d5cp03741g2.zip [file WTMAD1RungHistogram.pdf › ESI_WTMAD4_2025-11-18/07_PLOTS_AND_DATA_ALL_115/PLOTS/WTMAD1RungHistogram.pdf]

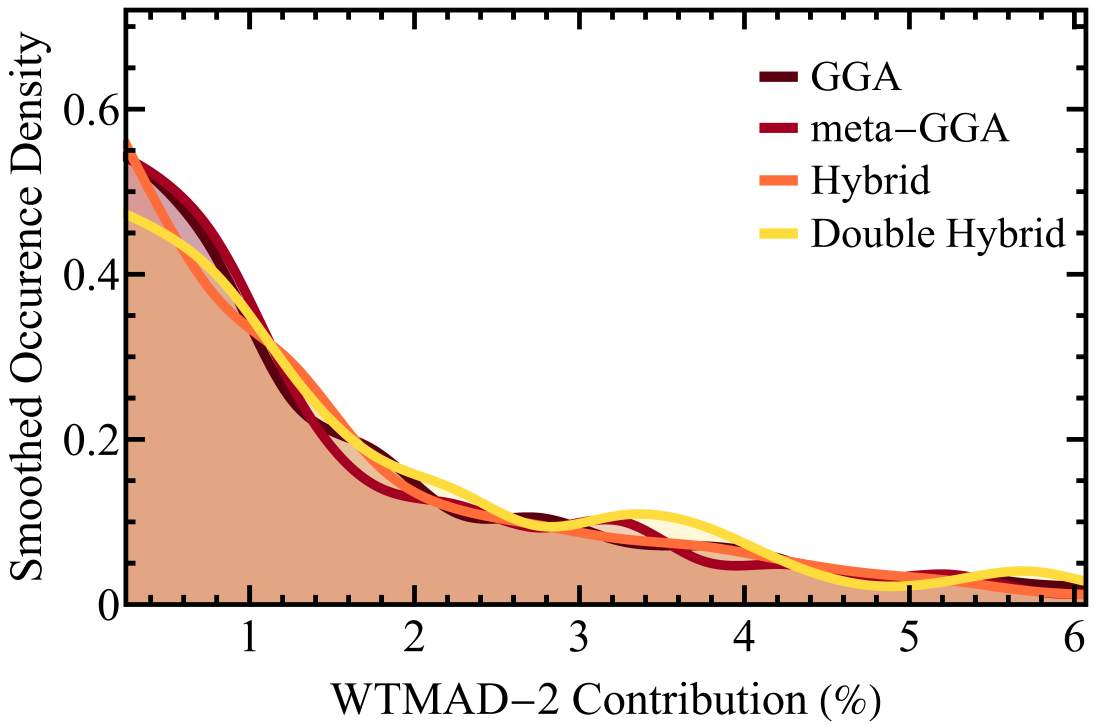

Supplement: d5cp03741g2.zip [file WTMAD2RungHistogram.pdf › ESI_WTMAD4_2025-11-18/07_PLOTS_AND_DATA_ALL_115/PLOTS/WTMAD2RungHistogram.pdf]

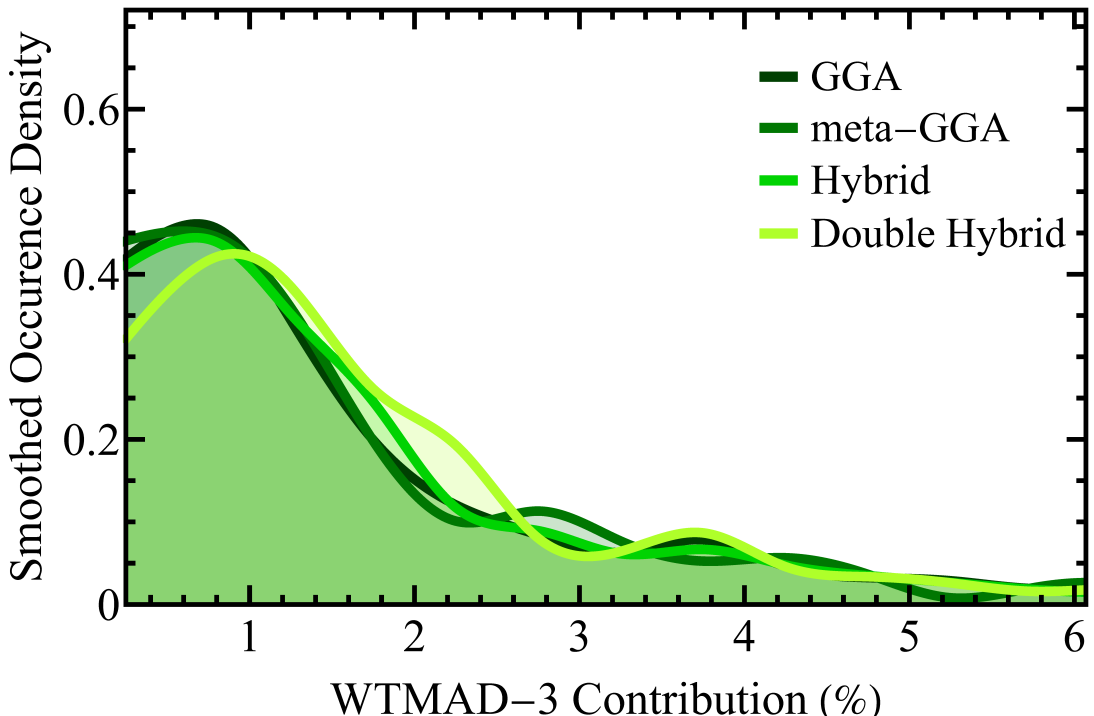

Supplement: d5cp03741g2.zip [file WTMAD3RungHistogram.pdf › ESI_WTMAD4_2025-11-18/07_PLOTS_AND_DATA_ALL_115/PLOTS/WTMAD3RungHistogram.pdf]

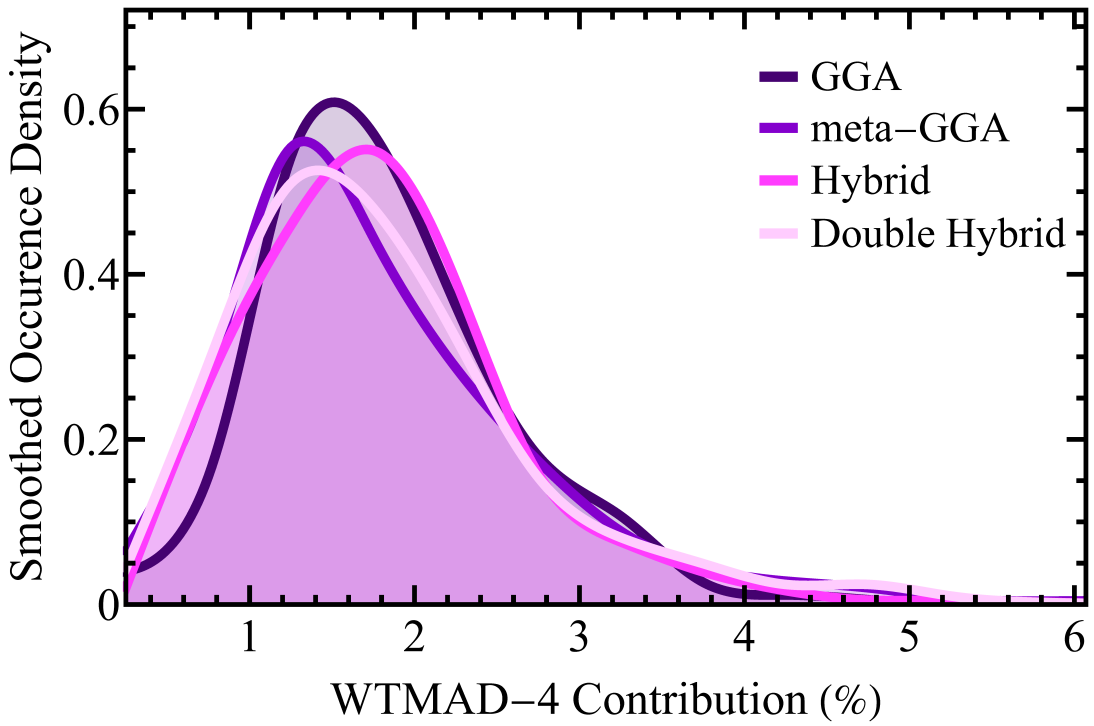

Supplement: d5cp03741g2.zip [file WTMAD4RungHistogram.pdf › ESI_WTMAD4_2025-11-18/07_PLOTS_AND_DATA_ALL_115/PLOTS/WTMAD4RungHistogram.pdf]

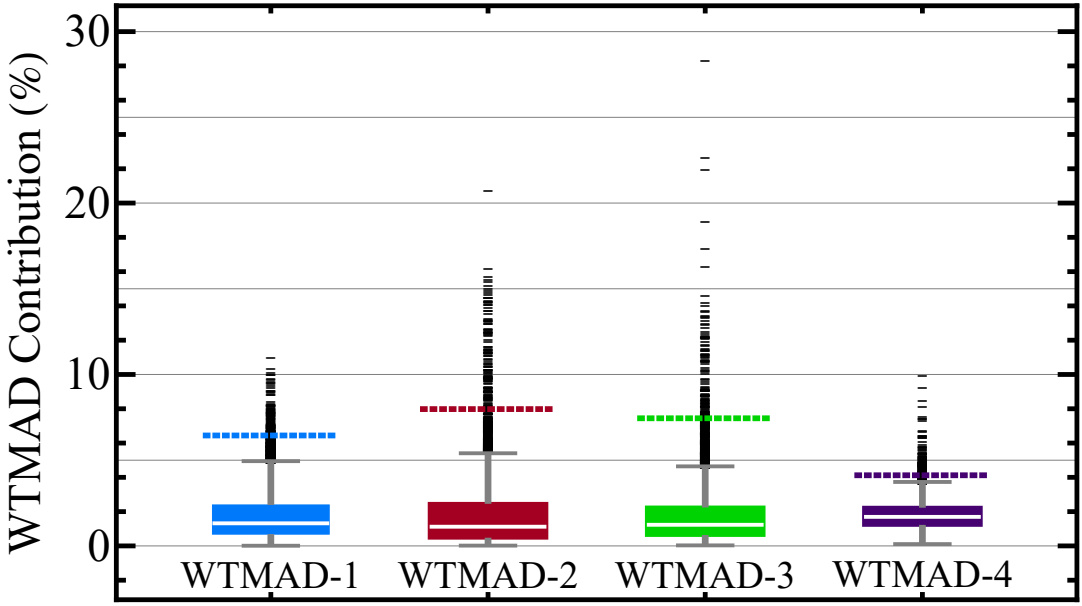

Supplement: d5cp03741g2.zip [file WTMADBoxPlot.pdf › ESI_WTMAD4_2025-11-18/07_PLOTS_AND_DATA_ALL_115/PLOTS/WTMADBoxPlot.pdf]

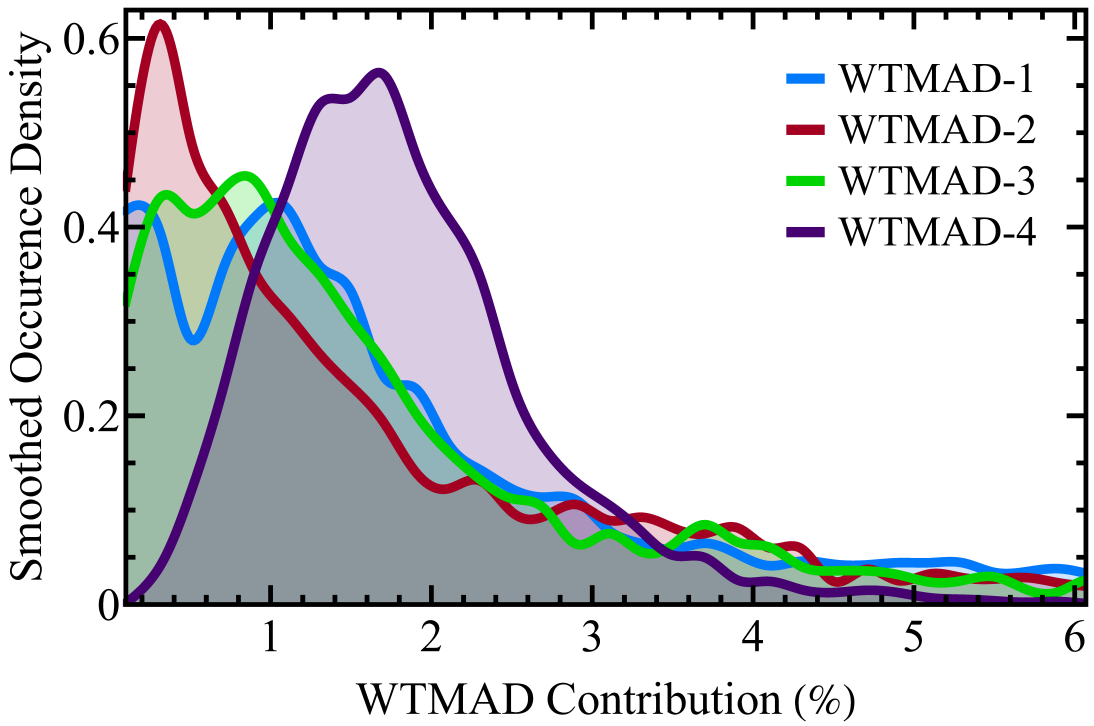

Supplement: d5cp03741g2.zip [file WTMADHistogram.pdf › ESI_WTMAD4_2025-11-18/07_PLOTS_AND_DATA_ALL_115/PLOTS/WTMADHistogram.pdf]



Supplement: d5cp03741g2.zip [file WTMAD1RungHistogram.pdf › ESI_WTMAD4_2025-11-18/07_PLOTS_AND_DATA_D3_10/PLOTS/WTMAD1RungHistogram.pdf]



Supplement: d5cp03741g2.zip [file WTMAD2RungHistogram.pdf › ESI_WTMAD4_2025-11-18/07_PLOTS_AND_DATA_D3_10/PLOTS/WTMAD2RungHistogram.pdf]



Supplement: d5cp03741g2.zip [file WTMAD3RungHistogram.pdf › ESI_WTMAD4_2025-11-18/07_PLOTS_AND_DATA_D3_10/PLOTS/WTMAD3RungHistogram.pdf]

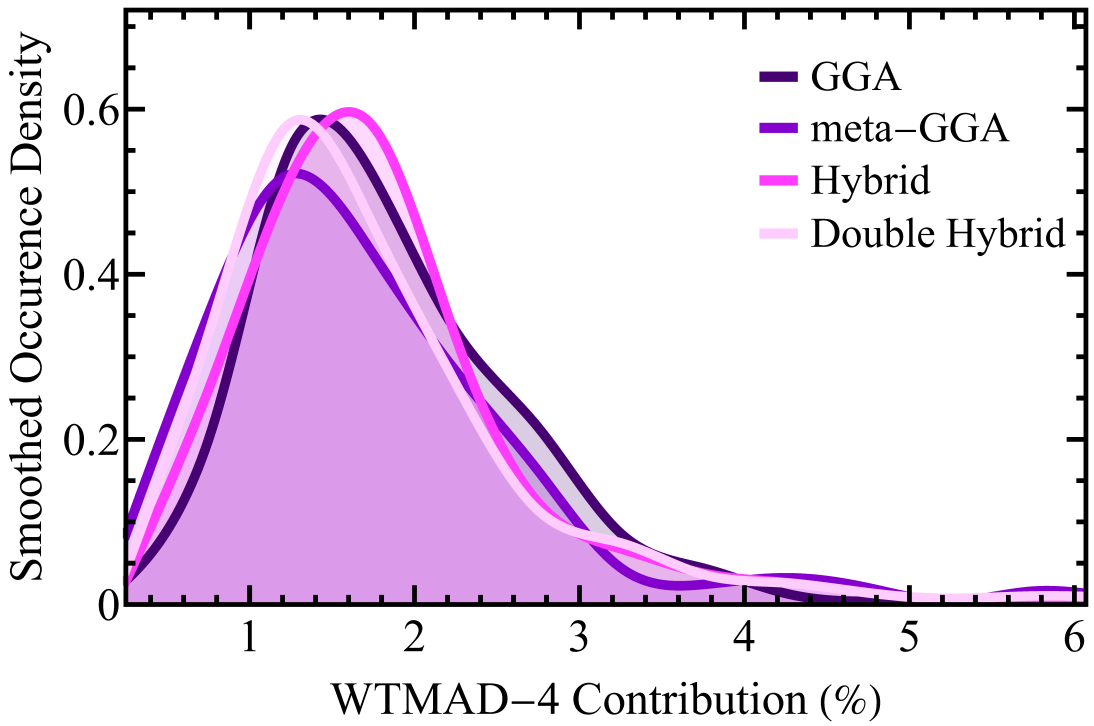

Supplement: d5cp03741g2.zip [file WTMAD4RungHistogram.pdf › ESI_WTMAD4_2025-11-18/07_PLOTS_AND_DATA_D3_10/PLOTS/WTMAD4RungHistogram.pdf]

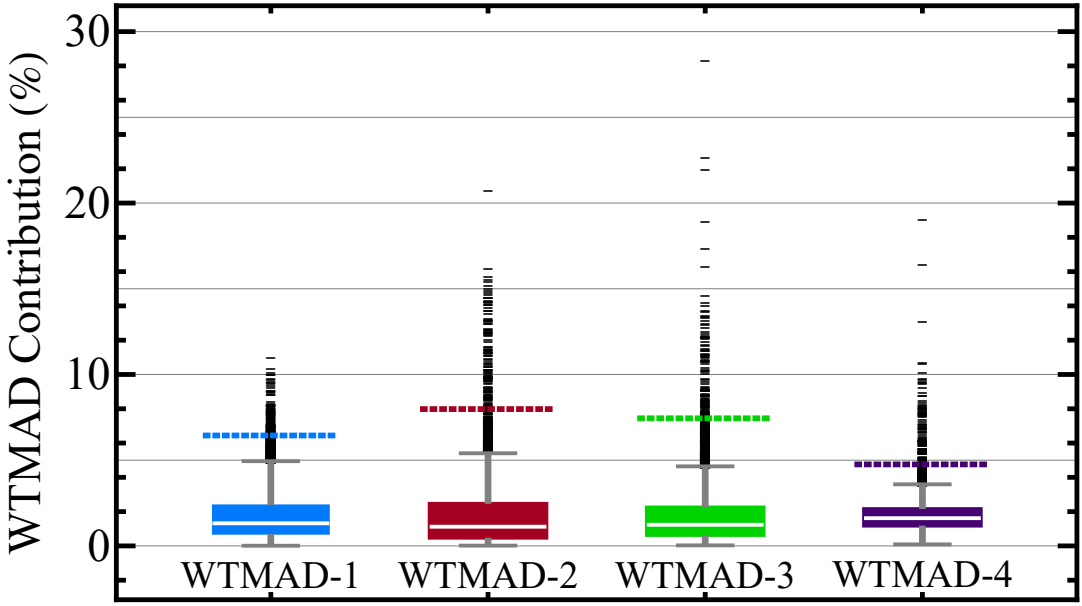

Supplement: d5cp03741g2.zip [file WTMADBoxPlot.pdf › ESI_WTMAD4_2025-11-18/07_PLOTS_AND_DATA_D3_10/PLOTS/WTMADBoxPlot.pdf]

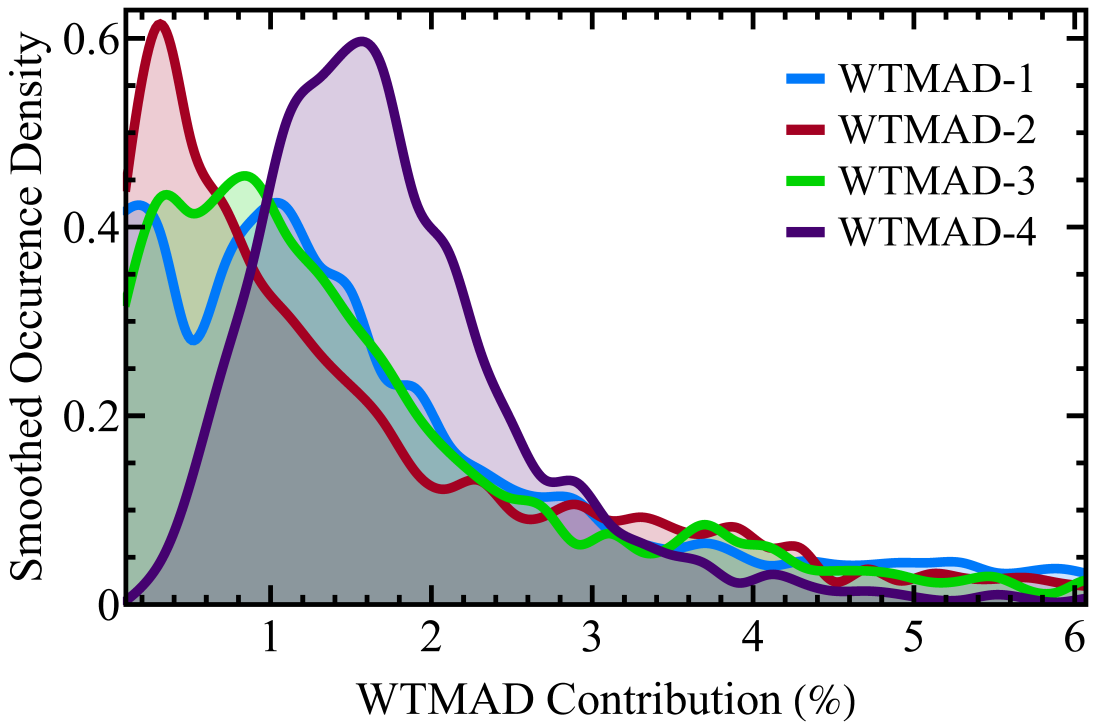

Supplement: d5cp03741g2.zip [file WTMADHistogram.pdf › ESI_WTMAD4_2025-11-18/07_PLOTS_AND_DATA_D3_10/PLOTS/WTMADHistogram.pdf]
